# Supplementary material for: Ground and excited electronic structures of metal encapsulated nanocages: the cases of endohedral M@C20H20(M = K, Rb, Ca, Sr) and M@C36H36(M = Na, K, Rb)
Source: Royal Society of Chemistry journal article supplement (doi:10.1039/d1cp03146e), 2021-01-01
Supplement: d1cp03146e1.pdf [file d1cp03146e1.pdf]

**Ground and Excited Electronic Structures of Metal  
Encapsulated Nanocages: The Cases of Endohedral  $M@C_{20}H_{20}$   
( $M = K, Rb, Ca, Sr$ ) and  $M@C_{36}H_{36}$  ( $M = Na, K, Rb$ )**

*Isuru R. Ariyaratna*

**Supporting Information**

Department of Chemistry and Biochemistry, Auburn University,  
Auburn, AL 36849, USA

Current Address: Department of Chemical Engineering, Massachusetts Institute of Technology,  
Cambridge, MA, 02139, USA









|  |  |  |  |  |  |  |  |  |        |        |        |        |        |        |
|--|--|--|--|--|--|--|--|--|--------|--------|--------|--------|--------|--------|
|  |  |  |  |  |  |  |  |  | 1301.9 | 1303.6 | 1298.7 | 1300.7 | 1291.9 | 1294.4 |
|  |  |  |  |  |  |  |  |  | 1305.9 | 1306.5 | 1299.4 | 1301.7 | 1292.9 | 1295.4 |
|  |  |  |  |  |  |  |  |  | 1306.1 | 1307.7 | 1299.5 | 1302.4 | 1293.1 | 1295.7 |
|  |  |  |  |  |  |  |  |  | 1306.4 | 1309.6 | 1301.3 | 1305.2 | 1296.5 | 1300.8 |
|  |  |  |  |  |  |  |  |  | 1310.1 | 1312.6 | 1302.0 | 1305.9 | 1298.6 | 1302.1 |
|  |  |  |  |  |  |  |  |  | 1311.0 | 1313.2 | 1306.1 | 1309.5 | 1302.9 | 1306.8 |
|  |  |  |  |  |  |  |  |  | 1313.4 | 1315.7 | 1308.4 | 1310.1 | 1305.1 | 1307.5 |
|  |  |  |  |  |  |  |  |  | 1314.2 | 1315.8 | 1309.4 | 1310.3 | 1306.0 | 1308.1 |
|  |  |  |  |  |  |  |  |  | 1315.2 | 1316.4 | 1312.6 | 1314.7 | 1311.3 | 1313.3 |
|  |  |  |  |  |  |  |  |  | 1317.6 | 1318.7 | 1312.9 | 1315.2 | 1312.1 | 1313.6 |
|  |  |  |  |  |  |  |  |  | 1318.6 | 1322.0 | 1313.9 | 1315.6 | 1312.7 | 1314.1 |
|  |  |  |  |  |  |  |  |  | 1319.8 | 1322.6 | 1318.0 | 1320.9 | 1314.9 | 1318.0 |
|  |  |  |  |  |  |  |  |  | 1321.3 | 1323.6 | 1318.8 | 1321.8 | 1318.3 | 1320.9 |
|  |  |  |  |  |  |  |  |  | 1323.0 | 1329.2 | 1319.4 | 1323.0 | 1318.6 | 1321.2 |
|  |  |  |  |  |  |  |  |  | 1328.1 | 1331.3 | 1325.3 | 1326.2 | 1320.0 | 1321.4 |
|  |  |  |  |  |  |  |  |  | 1330.3 | 1332.3 | 1325.8 | 1327.7 | 1323.7 | 1325.7 |
|  |  |  |  |  |  |  |  |  | 1331.1 | 1334.9 | 1327.9 | 1331.8 | 1324.0 | 1328.0 |
|  |  |  |  |  |  |  |  |  | 1332.8 | 1337.5 | 1330.3 | 1333.6 | 1328.1 | 1330.2 |
|  |  |  |  |  |  |  |  |  | 1337.5 | 1338.4 | 1332.1 | 1333.8 | 1328.7 | 1331.4 |
|  |  |  |  |  |  |  |  |  | 1337.5 | 1339.0 | 1334.0 | 1336.3 | 1331.1 | 1333.6 |
|  |  |  |  |  |  |  |  |  | 1337.7 | 1340.5 | 1334.6 | 1337.4 | 1331.4 | 1333.8 |
|  |  |  |  |  |  |  |  |  | 1345.0 | 1345.2 | 1340.6 | 1342.6 | 1337.6 | 1340.2 |
|  |  |  |  |  |  |  |  |  | 1345.1 | 1346.6 | 1341.4 | 1342.9 | 1338.7 | 1340.5 |
|  |  |  |  |  |  |  |  |  | 1345.5 | 1346.7 | 1342.5 | 1343.8 | 1340.2 | 1341.4 |
|  |  |  |  |  |  |  |  |  | 1355.0 | 1357.9 | 1352.5 | 1355.4 | 1346.8 | 1349.9 |
|  |  |  |  |  |  |  |  |  | 1359.4 | 1361.5 | 1355.3 | 1356.3 | 1349.8 | 1350.8 |
|  |  |  |  |  |  |  |  |  | 1361.1 | 1362.0 | 1357.3 | 1359.2 | 1353.7 | 1354.8 |
|  |  |  |  |  |  |  |  |  | 1362.3 | 1363.5 | 1358.0 | 1359.8 | 1354.7 | 1356.4 |
|  |  |  |  |  |  |  |  |  | 1363.2 | 1365.5 | 1360.1 | 1361.8 | 1355.8 | 1357.8 |
|  |  |  |  |  |  |  |  |  | 1366.2 | 1367.8 | 1363.3 | 1364.4 | 1356.3 | 1359.1 |
|  |  |  |  |  |  |  |  |  | 1366.6 | 1368.9 | 1364.0 | 1366.1 | 1356.6 | 1359.3 |
|  |  |  |  |  |  |  |  |  | 1367.9 | 1372.1 | 1364.3 | 1366.3 | 1358.4 | 1360.2 |
|  |  |  |  |  |  |  |  |  | 1371.0 | 1373.1 | 1365.9 | 1366.6 | 1359.1 | 1360.7 |
|  |  |  |  |  |  |  |  |  | 1372.8 | 1373.4 | 1365.9 | 1368.0 | 1360.0 | 1361.3 |
|  |  |  |  |  |  |  |  |  | 1373.1 | 1373.8 | 1367.2 | 1368.3 | 1360.6 | 1361.3 |
|  |  |  |  |  |  |  |  |  | 1373.7 | 1375.5 | 1368.1 | 1369.3 | 1361.1 | 1362.3 |
|  |  |  |  |  |  |  |  |  | 1375.6 | 1376.0 | 1369.8 | 1371.5 | 1363.2 | 1364.3 |
|  |  |  |  |  |  |  |  |  | 1377.0 | 1378.7 | 1372.0 | 1372.8 | 1366.7 | 1368.8 |
|  |  |  |  |  |  |  |  |  | 1379.9 | 1382.4 | 1372.5 | 1374.1 | 1367.1 | 1369.8 |
|  |  |  |  |  |  |  |  |  | 1382.5 | 1383.0 | 1376.6 | 1378.7 | 1367.4 | 1370.2 |
|  |  |  |  |  |  |  |  |  | 1385.0 | 1386.2 | 1378.7 | 1380.2 | 1369.7 | 1373.0 |
|  |  |  |  |  |  |  |  |  | 1385.3 | 1388.6 | 1380.5 | 1383.0 | 1371.4 | 1374.4 |
|  |  |  |  |  |  |  |  |  | 1391.9 | 1393.8 | 1384.6 | 1388.2 | 1374.0 | 1375.4 |
|  |  |  |  |  |  |  |  |  | 1399.7 | 1401.2 | 1387.3 | 1388.7 | 1375.3 | 1377.0 |
|  |  |  |  |  |  |  |  |  | 1401.1 | 1401.4 | 1387.4 | 1388.9 | 1375.5 | 1377.6 |
|  |  |  |  |  |  |  |  |  | 1402.3 | 1407.9 | 1389.1 | 1391.2 | 1378.9 | 1380.3 |
|  |  |  |  |  |  |  |  |  | 1407.1 | 1409.5 | 1389.7 | 1392.7 | 1381.1 | 1383.6 |
|  |  |  |  |  |  |  |  |  | 1411.4 | 1413.2 | 1394.6 | 1397.9 | 1385.4 | 1387.0 |
|  |  |  |  |  |  |  |  |  | 1415.5 | 1417.2 | 1396.0 | 1398.4 | 1387.8 | 1389.3 |
|  |  |  |  |  |  |  |  |  | 1416.9 | 1418.2 | 1400.7 | 1402.5 | 1389.6 | 1391.3 |
|  |  |  |  |  |  |  |  |  | 1441.1 | 1448.7 | 1400.9 | 1403.2 | 1392.1 | 1392.5 |
|  |  |  |  |  |  |  |  |  | 1442.0 | 1449.5 | 1402.3 | 1403.7 | 1394.4 | 1397.0 |
|  |  |  |  |  |  |  |  |  | 2968.8 | 3032.9 | 2993.7 | 3041.3 | 3000.4 | 3044.4 |
|  |  |  |  |  |  |  |  |  | 2971.2 | 3033.3 | 2995.3 | 3041.8 | 3002.5 | 3045.0 |
|  |  |  |  |  |  |  |  |  | 2980.0 | 3046.5 | 3001.1 | 3052.0 | 3004.1 | 3053.2 |
|  |  |  |  |  |  |  |  |  | 2982.0 | 3047.4 | 3002.9 | 3052.3 | 3006.7 | 3054.2 |
|  |  |  |  |  |  |  |  |  | 2985.0 | 3048.1 | 3004.5 | 3054.4 | 3006.8 | 3055.3 |
|  |  |  |  |  |  |  |  |  | 2990.1 | 3051.1 | 3006.4 | 3055.2 | 3009.7 | 3056.9 |
|  |  |  |  |  |  |  |  |  | 2991.8 | 3052.5 | 3007.4 | 3056.2 | 3010.8 | 3057.3 |
|  |  |  |  |  |  |  |  |  | 2992.4 | 3054.3 | 3009.3 | 3057.5 | 3011.4 | 3058.1 |
|  |  |  |  |  |  |  |  |  | 2993.9 | 3056.4 | 3009.6 | 3060.0 | 3012.8 | 3061.4 |
|  |  |  |  |  |  |  |  |  | 2995.8 | 3056.6 | 3012.1 | 3062.9 | 3016.7 | 3065.2 |
|  |  |  |  |  |  |  |  |  | 2996.8 | 3062.4 | 3014.3 | 3065.2 | 3018.7 | 3065.5 |
|  |  |  |  |  |  |  |  |  | 2999.6 | 3063.7 | 3016.4 | 3066.2 | 3020.4 | 3066.2 |
|  |  |  |  |  |  |  |  |  | 3007.4 | 3065.0 | 3020.4 | 3068.3 | 3021.7 | 3069.3 |
|  |  |  |  |  |  |  |  |  | 3009.4 | 3067.5 | 3021.3 | 3071.0 | 3023.4 | 3071.9 |
|  |  |  |  |  |  |  |  |  | 3009.6 | 3071.2 | 3023.3 | 3077.4 | 3025.5 | 3078.0 |
|  |  |  |  |  |  |  |  |  | 3011.7 | 3075.8 | 3024.3 | 3080.7 | 3025.6 | 3081.0 |
|  |  |  |  |  |  |  |  |  | 3012.1 | 3077.6 | 3025.7 | 3081.2 | 3031.1 | 3081.4 |
|  |  |  |  |  |  |  |  |  | 3013.2 | 3078.5 | 3026.8 | 3081.4 | 3031.4 | 3081.7 |
|  |  |  |  |  |  |  |  |  | 3016.3 | 3078.6 | 3029.2 | 3082.3 | 3032.3 | 3082.7 |
|  |  |  |  |  |  |  |  |  | 3016.5 | 3079.5 | 3029.2 | 3083.0 | 3036.8 | 3082.8 |
|  |  |  |  |  |  |  |  |  | 3018.6 | 3080.9 | 3030.4 | 3083.1 | 3037.6 | 3084.2 |
|  |  |  |  |  |  |  |  |  | 3019.8 | 3081.9 | 3032.0 | 3085.4 | 3038.0 | 3086.1 |
|  |  |  |  |  |  |  |  |  | 3024.7 | 3083.4 | 3033.3 | 3087.3 | 3038.4 | 3087.4 |
|  |  |  |  |  |  |  |  |  | 3027.5 | 3087.5 | 3038.0 | 3092.6 | 3038.9 | 3093.3 |
|  |  |  |  |  |  |  |  |  | 3028.5 | 3090.8 | 3039.2 | 3094.6 | 3039.7 | 3093.8 |
|  |  |  |  |  |  |  |  |  | 3028.6 | 3090.9 | 3040.0 | 3094.7 | 3039.9 | 3095.3 |
|  |  |  |  |  |  |  |  |  | 3028.7 | 3093.1 | 3040.5 | 3096.9 | 3040.8 | 3098.2 |
|  |  |  |  |  |  |  |  |  | 3042.3 | 3095.9 | 3044.6 | 3098.4 | 3045.2 | 3098.6 |
|  |  |  |  |  |  |  |  |  | 3043.5 | 3097.4 | 3047.8 | 3101.2 | 3045.4 | 3102.1 |
|  |  |  |  |  |  |  |  |  | 3043.9 | 3098.6 | 3048.0 | 3102.7 | 3046.7 | 3103.8 |
|  |  |  |  |  |  |  |  |  | 3044.6 | 3106.8 | 3053.7 | 3109.6 | 3050.9 | 3109.2 |
|  |  |  |  |  |  |  |  |  | 3049.8 | 3108.4 | 3059.0 | 3109.8 | 3057.5 | 3109.4 |
|  |  |  |  |  |  |  |  |  | 3053.3 | 3110.5 | 3059.2 | 3113.3 | 3065.3 | 3112.6 |
|  |  |  |  |  |  |  |  |  | 3053.3 | 3110.9 | 3062.0 | 3115.0 | 3069.2 | 3114.1 |
|  |  |  |  |  |  |  |  |  | 3060.8 | 3137.8 | 3084.0 | 3135.3 | 3090.9 | 3129.7 |
|  |  |  |  |  |  |  |  |  | 3069.0 | 3138.9 | 3086.8 | 3136.6 | 3091.1 | 3131.7 |

**Table S4.** Vertical electron attachment energies (eV) and pole strengths (in parentheses) of  $\text{K@C}_{20}\text{H}_{20}^+$ , at neutral  $\text{K@C}_{20}\text{H}_{20}$  geometry (optimized at B3LYP/aug-cc-pVTZ level) obtained from diagonal electron propagator methods using cc-pVTZ (K, C) and d-aug-cc-pVTZ (H). All valence electrons are correlated.

| Final State<br>( $I_h$ ) | Vertical electron attachment energies and pole strengths |                |                |                |
|--------------------------|----------------------------------------------------------|----------------|----------------|----------------|
|                          | KT                                                       | D2 (PS)        | P3 (PS)        | P3+ (PS)       |
| $1^2\text{A}_g$          | -1.765                                                   | -2.153 (0.985) | -2.115 (0.986) | -2.120 (0.985) |
| $1^2\text{T}_{1u}$       | -1.547                                                   | -1.855 (0.988) | -1.831 (0.988) | -1.834 (0.988) |
| $1^2\text{H}_g$          | -1.200                                                   | -1.412 (0.992) | -1.399 (0.991) | -1.400 (0.991) |
| $1^2\text{T}_{2u}$       | -0.807                                                   | -0.953 (0.994) | -0.943 (0.994) | -0.944 (0.994) |
| $1^2\text{G}_u$          | -0.782                                                   | -0.880 (0.996) | -0.877 (0.996) | -0.878 (0.996) |
| $2^2\text{A}_g$          | -0.738                                                   | -0.994 (0.990) | -0.961 (0.991) | -0.965 (0.991) |
| $2^2\text{T}_{1u}$       | -0.664                                                   | -0.889 (0.991) | -0.864 (0.992) | -0.867 (0.992) |
| $1^2\text{G}_g$          | -0.398                                                   | -0.441 (0.998) | -0.441 (0.998) | -0.441 (0.998) |
| $2^2\text{H}_g$          | -0.364                                                   | -0.610 (0.990) | -0.587 (0.991) | -0.590 (0.991) |
| $2^2\text{T}_{2u}$       | 0.062                                                    | -0.338 (0.985) | -0.291 (0.986) | -0.296 (0.986) |
| $2^2\text{G}_u$          | 0.097                                                    | -0.126 (0.991) | -0.115 (0.991) | -0.116 (0.991) |

**Table S5.** Vertical electron attachment energies (eV) and pole strengths (in parentheses) of  $\text{Rb@C}_{20}\text{H}_{20}^+$  at neutral  $\text{Rb@C}_{20}\text{H}_{20}$  geometry, obtained from diagonal electron propagator methods using cc-pVTZ (C), d-aug-cc-pVTZ (H), and cc-pVTZ-PP (Rb) (Rb: 28 ECP). All valence electrons are correlated.

| Final state<br>( $I_h$ ) | Vertical electron attachment energies and pole strengths |                |                |                |
|--------------------------|----------------------------------------------------------|----------------|----------------|----------------|
|                          | KT                                                       | D2 (PS)        | P3 (PS)        | P3+ (PS)       |
| $1^2\text{A}_g$          | -1.738                                                   | -2.100 (0.986) | -2.060 (0.987) | -2.065 (0.987) |
| $1^2\text{T}_{1u}$       | -1.530                                                   | -1.827 (0.988) | -1.796 (0.989) | -1.800 (0.988) |
| $1^2\text{H}_g$          | -1.198                                                   | -1.408 (0.992) | -1.390 (0.992) | -1.392 (0.992) |
| $1^2\text{T}_{2u}$       | -0.808                                                   | -0.956 (0.994) | -0.942 (0.994) | -0.944 (0.994) |
| $1^2\text{G}_u$          | -0.781                                                   | -0.881 (0.996) | -0.876 (0.996) | -0.876 (0.996) |
| $2^2\text{A}_g$          | -0.735                                                   | -0.969 (0.991) | -0.936 (0.992) | -0.940 (0.992) |
| $2^2\text{T}_{1u}$       | -0.651                                                   | -0.880 (0.991) | -0.849 (0.992) | -0.853 (0.992) |
| $1^2\text{G}_g$          | -0.399                                                   | -0.444 (0.998) | -0.442 (0.998) | -0.442 (0.998) |
| $2^2\text{H}_g$          | -0.377                                                   | -0.612 (0.991) | -0.585 (0.991) | -0.588 (0.991) |
| $2^2\text{T}_{2u}$       | 0.056                                                    | -0.347 (0.985) | -0.289 (0.986) | -0.297 (0.986) |
| $2^2\text{G}_u$          | 0.092                                                    | -0.129 (0.991) | -0.113 (0.991) | -0.114 (0.991) |

**Table S6.** Vertical electron attachment energies (eV) and pole strengths (in parentheses) of  $\text{Ca@C}_{20}\text{H}_{20}^{2+}$  at neutral  $\text{Ca@C}_{20}\text{H}_{20}^+$  geometry, obtained from diagonal electron propagator methods using cc-pVTZ (Ca, C) and d-aug-cc-pVTZ (H). All valence electrons are correlated.

| Final state ( $I_h$ ) | Vertical electron attachment energies and pole strengths |                |                |                |
|-----------------------|----------------------------------------------------------|----------------|----------------|----------------|
|                       | KT                                                       | D2 (PS)        | P3 (PS)        | P3+ (PS)       |
| $1^2A_g$              | -4.417                                                   | -5.210 (0.972) | -5.098 (0.974) | -5.113 (0.974) |
| $1^2T_{1u}$           | -4.068                                                   | -4.743 (0.975) | -4.663 (0.977) | -4.672 (0.976) |
| $1^2H_g$              | -3.563                                                   | -4.153 (0.979) | -4.078 (0.980) | -4.088 (0.980) |
| $1^2T_{2u}$           | -3.082                                                   | -3.765 (0.976) | -3.670 (0.978) | -3.683 (0.978) |

**Table S7.** Vertical electron attachment energies (eV) and pole strengths (in parentheses) of  $\text{Na@C}_{36}\text{H}_{36}^+$  at neutral  $\text{Na@C}_{36}\text{H}_{36}$  geometry, obtained from diagonal electron propagator methods using cc-pVDZ (Na, C) and d-aug-cc-pVDZ (H). All valence electrons are correlated.

| Final state ( $D_2$ ) | Vertical electron attachment energies and pole strengths |                |                |                |
|-----------------------|----------------------------------------------------------|----------------|----------------|----------------|
|                       | KT                                                       | D2 (PS)        | P3 (PS)        | P3+ (PS)       |
| $1^2A$                | -1.723                                                   | -2.490 (0.972) | -2.356 (0.975) | -2.375 (0.975) |
| $1^2B_1$              | -1.463                                                   | -1.887 (0.984) | -1.855 (0.983) | -1.859 (0.983) |
| $1^2B_2$              | -1.444                                                   | -1.882 (0.983) | -1.846 (0.983) | -1.850 (0.983) |
| $1^2B_3$              | -1.365                                                   | -1.800 (0.983) | -1.757 (0.984) | -1.762 (0.984) |
| $2^2B_3$              | -1.118                                                   | -1.392 (0.989) | -1.380 (0.988) | -1.382 (0.988) |
| $2^2A$                | -1.115                                                   | -1.385 (0.989) | -1.373 (0.989) | -1.375 (0.989) |
| $2^2B_2$              | -1.081                                                   | -1.341 (0.990) | -1.333 (0.989) | -1.334 (0.989) |
| $2^2B_1$              | -1.075                                                   | -1.343 (0.989) | -1.334 (0.989) | -1.335 (0.989) |
| $3^2A$                | -1.072                                                   | -1.350 (0.989) | -1.340 (0.988) | -1.341 (0.988) |

**Table S8.** Vertical electron attachment energies (eV) and pole strengths (in parentheses) of  $\text{K@C}_{36}\text{H}_{36}^+$  at neutral  $\text{K@C}_{36}\text{H}_{36}$  geometry, obtained from diagonal electron propagator methods using cc-pVDZ (K, C) and d-aug-cc-pVDZ (H). All valence electrons are correlated.

| Final state ( $D_2$ ) | Vertical electron attachment energies and pole strengths |                |                |                |
|-----------------------|----------------------------------------------------------|----------------|----------------|----------------|
|                       | KT                                                       | D2 (PS)        | P3 (PS)        | P3+ (PS)       |
| $1^2A$                | -1.636                                                   | -2.228 (0.978) | -2.150 (0.979) | -2.161 (0.979) |
| $1^2B_1$              | -1.430                                                   | -1.812 (0.985) | -1.785 (0.985) | -1.788 (0.985) |
| $1^2B_2$              | -1.425                                                   | -1.823 (0.985) | -1.794 (0.984) | -1.797 (0.984) |
| $1^2B_3$              | -1.350                                                   | -1.750 (0.985) | -1.717 (0.984) | -1.721 (0.984) |
| $2^2B_3$              | -1.122                                                   | -1.394 (0.989) | -1.379 (0.989) | -1.381 (0.989) |
| $2^2A$                | -1.118                                                   | -1.388 (0.989) | -1.374 (0.989) | -1.375 (0.989) |
| $2^2B_1$              | -1.084                                                   | -1.352 (0.990) | -1.340 (0.989) | -1.342 (0.989) |
| $2^2B_2$              | -1.084                                                   | -1.346 (0.990) | -1.335 (0.989) | -1.336 (0.989) |
| $3^2A$                | -1.073                                                   | -1.340 (0.990) | -1.330 (0.989) | -1.331 (0.989) |



**Table S9.** Vertical electron attachment energies (eV) and pole strengths (in parentheses) of  $\text{Rb@C}_{36}\text{H}_{36}^+$  at neutral  $\text{Rb@C}_{36}\text{H}_{36}$  geometry, obtained from diagonal electron propagator methods using cc-pVDZ (C), d-aug-cc-pVDZ (H), and cc-pVDZ-PP (Rb) (Rb: 28 ECP). All valence electrons are correlated.

| Final state<br>( $D_2$ ) | Vertical electron attachment energies and pole strengths |                |                |                |
|--------------------------|----------------------------------------------------------|----------------|----------------|----------------|
|                          | KT                                                       | D2 (PS)        | P3 (PS)        | P3+ (PS)       |
| $1^2\text{A}$            | -1.617                                                   | -2.167 (0.979) | -2.098 (0.980) | -2.107 (0.980) |
| $1^2\text{B}_1$          | -1.414                                                   | -1.777 (0.986) | -1.751 (0.985) | -1.754 (0.985) |
| $1^2\text{B}_2$          | -1.413                                                   | -1.795 (0.985) | -1.766 (0.985) | -1.770 (0.985) |
| $1^2\text{B}_3$          | -1.345                                                   | -1.720 (0.986) | -1.692 (0.985) | -1.695 (0.985) |
| $2^2\text{B}_3$          | -1.116                                                   | -1.404 (0.989) | -1.385 (0.988) | -1.388 (0.988) |
| $2^2\text{A}$            | -1.113                                                   | -1.399 (0.989) | -1.381 (0.988) | -1.383 (0.988) |
| $2^2\text{B}_1$          | -1.083                                                   | -1.365 (0.989) | -1.350 (0.988) | -1.352 (0.988) |
| $2^2\text{B}_2$          | -1.082                                                   | -1.355 (0.989) | -1.341 (0.989) | -1.343 (0.989) |
| $3^2\text{A}$            | -1.072                                                   | -1.347 (0.989) | -1.334 (0.988) | -1.335 (0.989) |
